# 1 Human *CCL3L1* copy number variation, gene expression, and the role of the CCL3L1-CCR5 axis 2 in lung function

3  
4 Adeolu B Adewoye (1)\*, Nick Shrine (2)\*, Linda Odenthal-Hesse (1), Samantha Welsh (3),  
5 Anders Malarstig (4), Scott Jelinsky (5), Iain Kilty (5), Martin D Tobin (2,6), Edward J Hollox (1)†,  
6 Louise V Wain (2,6)†

- 7  
8 1. Department of Genetics and Genome Biology, University of Leicester, Leicester, UK  
9 2. Department of Health Sciences, University of Leicester, Leicester, UK  
10 3. UK Biobank, Stockport, UK  
11 4. Pfizer Worldwide Research and Development, Stockholm, Sweden.  
12 5. Pfizer Worldwide Research and Development, Cambridge, Massachusetts, USA  
13 6. National Institute of Health Research Biomedical Research Centre, University of  
14 Leicester, Leicester, UK

15  
16 \* † These authors contributed equally to this work.

17  
18 Corresponding authors: Edward J Hollox ([ejh33@leicester.ac.uk](mailto:ejh33@leicester.ac.uk)), Louise V Wain  
19 ([lvw1@leicester.ac.uk](mailto:lvw1@leicester.ac.uk))

20  
21 **Keywords: copy number variation, lung function, CCL3L1, CCR5, CNV, UK Biobank**

## 22 23 Abstract

24  
25 The CCL3L1-CCR5 signaling axis is important in a number of inflammatory responses, including  
26 macrophage function, and T-cell-dependent immune responses. Small molecule CCR5  
27 antagonists exist, including the approved antiretroviral drug maraviroc, and therapeutic  
28 monoclonal antibodies are in development. Repositioning of drugs and targets into new disease  
29 areas can accelerate the availability of new therapies and substantially reduce costs. As it has  
30 been shown that drug targets with genetic evidence supporting their involvement in the  
31 disease are more likely to be successful in clinical development, using genetic association  
32 studies to identify new target repurposing opportunities could be fruitful. Here we investigate  
33 the potential of perturbation of the CCL3L1-CCR5 axis as treatment for respiratory disease.  
34 Europeans typically carry between 0 and 5 copies of *CCL3L1* and this multi-allelic variation is not  
35 detected by widely used genome-wide single nucleotide polymorphism studies. We directly  
36 measured the complex structural variation of *CCL3L1* using the Parologue Ratio Test (PRT) and  
37 imputed (with validation) CCR5del32 genotypes in 5,000 individuals from UK Biobank, selected  
38 from the extremes of the lung function distribution, and analysed DNA and RNAseq data for  
39 *CCL3L1* from the 1000 Genomes Project. We confirmed the gene dosage effect of *CCL3L1* copy  
40 number on *CCL3L1* mRNA expression levels. We found no evidence for association of *CCL3L1*  
41 copy number or CCR5del32 genotype with lung function suggesting that repositioning CCR5  
42 antagonists is unlikely to be successful for the treatment of airflow obstruction.  
43  
44

## 45 Introduction

46  
47 Genome-wide association studies have identified thousands of disease-gene associations  
48 leading to new disease insight and potential new approaches to treatment. It has been shown  
49 that drug targets supported by genetic studies have an increased chance of success in clinical  
50 development [1]. Even so, only a subset of candidate drugs will make it through to the clinic.  
51 Identifying opportunities for repositioning existing drugs and targets is therefore an appealing  
52 prospect and using genetic studies to define alternative indications for an already-approved  
53 drug is a promising approach.

54  
55 The Mip1alpha (encoded by *CCL3* and *CCL3L1*)-CCR5 signaling axis is important in a number of  
56 inflammatory responses, including macrophage function, and T-cell-dependent immune  
57 responses [2]. It is perturbed by CCR5 antagonists such as Pfizer's maraviroc, the only CCR5  
58 antagonist to be approved by the United States Food and Drug Administration [3, 4].  
59 Identification of a genetic association of variants within the genes involved (*CCR5* and  
60 *CCL3/CCL3L1*) would strongly support the potential use of CCR5 antagonists in the treatment of  
61 respiratory conditions [5].

62  
63 In mice, MIP1alpha is implicated in virus-mediated inflammation of the lung, pulmonary  
64 eosinophilia following paramyxovirus infection, clearance of pulmonary infections [6, 7], and in  
65 the response to respiratory syncytial virus infection [8-10]. In humans Mip1alpha controls the  
66 recruitment of immune cells to inflammatory foci, and increased levels of Mip1alpha mRNA are  
67 found in bronchial epithelial cells of COPD patients [11], and increased protein levels in the  
68 sputum of COPD patients [12] where increased macrophage and neutrophil infiltration in the  
69 lung is a key pathology.

70  
71 The *CCR5* gene in humans has a 32bp exonic deletion allele (rs333, *CCR5d32*) with a minor allele  
72 frequency of between 5-15% in Europeans [13]. This allele causes a translational frameshift  
73 and abrogates expression of the receptor at the cell surface, such that homozygotes for the  
74 deletion allele lack any functional CCR5 receptor [14, 15]. This variant has been strongly and  
75 repeatedly associated with resistance to HIV infection and slower HIV progression, as CCR5 is a  
76 common coreceptor for HIV entry into T-lymphocytes [16]. The *CCR5d32* allele has been  
77 suggested to confer a reduced risk of asthma in children in one study [17] although this has not  
78 been replicated [18, 19].

79  
80 In humans, there are two isoforms of Mip1alpha, the LD78a isoform encoded by the *CCL3* gene  
81 and the LD78b isoform encoded by the paralogous *CCL3L1* gene [20, 21]. The two isoforms  
82 differ by three amino acids, but only one of these small changes, a serine to proline change at  
83 position 2 of the mature protein, alters the affinity to the cell surface receptor CCR5, with the  
84 beta isoform (*CCL3L1*) having approximately six-fold greater affinity [22] for CCR5 than the  
85 alpha isoform (*CCL3*).

86  
87 The *CCL3L1* gene is part of a complex structurally variable region, although the *CCL3* gene is not.  
88 The *CCL3L1* gene and the neighboring *CCL4L1* gene are tandemly repeated with the total diploid

89 copy number ranging from 0 copies to 6 copies in Europeans [23, 24]. Higher copy numbers are  
90 observed elsewhere, for example 10 in Tanzanians [25] and 14 in Ethiopians [26]. Previous  
91 studies have shown evidence of a gene dosage effect, with *CCL3L1* gene dose reflected in mRNA  
92 levels as well as in the ability to chemoattract monocytes [27, 28].

93  
94 Measuring *CCL3L1* multiallelic copy number variation has been challenging [29]. Early studies  
95 used qPCR assays with a low signal:noise ratio [23, 30, 31], but assays based on the paralogue  
96 ratio test (PRT), allowed more accurate estimation of diploid copy number [24, 32]. Because of  
97 the challenges in measuring *CCL3L1* copy number in sufficiently large and well-powered sample  
98 sizes, the effect of structural variation of the genes encoding the Mip1alpha-CCR5 ligand-  
99 receptor pair has not been adequately explored.

100  
101 In this study, we set out to confirm previous reports that *CCL3L1* copy number is associated  
102 with *CCL3L1* gene expression, then measure *CCL3L1* copy number and *CCR5d32* genotype in  
103 5000 individuals from UK Biobank, and finally test for association with lung function.  
104 Furthermore, we validated our copy number typing approach and observed copy number  
105 frequencies using publicly available sequence data from the 1000 Genomes Project. For *CCL3L1*  
106 copy number measurement in the 5000 individuals from UK Biobank, we used a triplex  
107 paralogue ratio test (PRT) which is considered to be the gold standard approach for  
108 measurement of this copy number variation [24, 29]. For genotyping of *CCR5d32* in UK  
109 Biobank, we used a standard genotype imputation approach with additional PCR validation. We  
110 tested for association with extremes of Forced Expired Volume in 1 second ( $FEV_1$ ) as a binary  
111 trait. This study is the largest analysis of the effect of *CCL3L1* copy number and *CCR5d32*  
112 genotypes on lung function undertaken to date.

113  
114  
115

## 116 **Methods**

### 117 ***Sample selection***

118 Individuals were selected from the UK BiLEVE [33, 34] subset of UK Biobank. In brief, 502,682  
119 individuals were recruited to UK Biobank of whom 275,939 were of self-reported European-  
120 ancestry, and had two or more measures of Forced Expiratory Volume in 1s (FEV<sub>1</sub>) and Forced  
121 Vital Capacity (FVC) measures (Vitalograph Pneumotrac 6800, Buckingham, UK) passing  
122 ATS/ERS criteria [35]. Based on the highest available FEV<sub>1</sub> measurement, 50,008 individuals  
123 with extreme low (n=10,002), near-average (n=10,000) and extreme high (n=5,002) % predicted  
124 FEV<sub>1</sub> were selected from amongst never-smokers (total n=105,272) and heavy-smokers (mean  
125 35 pack-years of smoking, total n=46,758), separately. For this study, we selected 2500 age-  
126 matched European-ancestry heavy smokers from the extreme high and extreme low %  
127 predicted FEV<sub>1</sub> subsets defined for the UK BiLEVE study (Figure 1, Table 1). DNA samples for  
128 these 5000 individuals were prepared by UK Biobank and provided back to the University of  
129 Leicester with new identification codes such that typing of *CCL3L1* copy number and *CCR5d32*  
130 was blinded to lung function status. Positive control samples for the copy number typing were  
131 from the Human Random Control panel from Public Health England.

132

### 133 ***CCL3L1 copy number estimation in UK Biobank and 1000 Genomes Project samples using the*** 134 ***paralogue ratio test (PRT)***

135 *CCL3L1* copy number was determined using a triplex paralogue ratio test (PRT) assay as used  
136 previously [24, 26]. Briefly, PRT is a comparative PCR method that amplifies a test and  
137 reference locus using the same pair of primers, followed by capillary electrophoresis and  
138 quantification of the two products [32, 36]. The triplex assay produced three independent  
139 estimates of copy number per test, of which the average was taken as a representative copy  
140 number value. The three values were consistent in 95% of samples, however, for 5% of samples  
141 the value from the LTR61A PRT assay was significantly lower than the other two PRT values, and  
142 an average of the two consistent PRTs was taken in these 5% of samples. For each typing  
143 experiment, 4 positive controls of known copy number were also included, as previously [26,  
144 37]. The copy number values clustered about integer copy numbers, and a Gaussian mixture  
145 model was fitted to allow assignment of individuals to an integer copy number call using  
146 CNVtools [38]. For the 5000 individuals from UK Biobank, 58 individuals were selected by UK  
147 Biobank investigators as blind spiked duplicates as part of the quality control check to ensure  
148 genotyping accuracy. Copy numbers from UK Biobank samples are available from UK Biobank at  
149 <http://www.ukbiobank.ac.uk/data-showcase/>.

150

### 151 ***Gene Expression levels in 1000 genomes project lymphoblastoid cell lines***

152 Matched RNAseq data that is publically available for the 1000 genomes samples were grouped  
153 based on *CCL3L1* copy number and analysed for their differential expression using Cufflinks  
154 v2.1.1 [39]. This allows measurement of the effect of genomic copy number of *CCL3L1* on gene  
155 expression levels. The analyses were all performed on ALICE High Performance Computing  
156 Facility at the University of Leicester. The RNAseq data were generated by (Lappalainen et  
157 al. 2013) and deposited in EBI ArrayExpress (accessions E-GEUV-1, E-GEUV-2, E-GEUV-3). Using  
158 Cufflinks, the fragments per kilobase of transcript per million fragments mapped (FPKM) values  
159 were estimated by applying a statistical model that normalises the mapped reads by length and

160 their abundance. Briefly, the fragment reads are divided by transcript size and the total number  
161 of reads and then adjusted to 1 kb and 1 million reads.

162

### 163 **Genotyping of *CCR5d32* polymorphism**

164 Imputation to 1000 Genomes Project Phase 1+UK10K reference panel [40] and PCR were used  
165 to genotype the *CCR5del32* polymorphism (rs333) in the 5000 UK Biobank individuals. Phasing  
166 and imputation were undertaken with SHAPEIT v2.r790 [41] and IMPUTE2 v2.3.1 [42]. For  
167 individuals with imputation posterior probability <0.95 (431 samples), and an additional 20  
168 samples that were imputed as homozygous for the minor del32 allele, we validated the  
169 imputation results using direct PCR genotyping. Duplicates of a random selection of 28 of  
170 individuals were included as a quality control check for genotyping reproducibility (genotyping  
171 was also blinded to duplicate status). Genotypes from UK Biobank samples are available from  
172 UK Biobank at <http://www.ukbiobank.ac.uk/data-showcase/>.

173

### 174 ***CCL3L1* copy number estimation from sequencing data for 1000 Genomes Project individuals**

175 1000 genomes phase 3 whole genome aligned Bam files generated from Illumina platforms  
176 available from the European Bioinformatics Institute  
177 ([ftp://ftp.1000genomes.ebi.ac.uk/vol1/ftp/data\\_collections/](ftp://ftp.1000genomes.ebi.ac.uk/vol1/ftp/data_collections/)) were downloaded and the  
178 genomic region including *CCL3L1* (hg19:chr17:33670000-35670000) was analysed using CNVrd2  
179 [43]. Using 500bp window sequence read depth, the sequence read depth was calculated  
180 across the region for all 2502 genomes from 26 populations, and standard deviation/quantile  
181 calculated for each window. The segmentation scores obtained from this analysis were  
182 clustered into different groups using a Gaussian mixture model. A prior information for all  
183 populations was estimated using the expectation maximisation (EM) algorithm on a population  
184 group with clear clusters of segmentation scores. The prior information (means, standard  
185 deviations and proportions of the mixture components) was fed into Bayesian model to infer  
186 *CCL3L1* integer copy number in all populations. Copy number estimates are available from  
187 dbVar (<https://www.ncbi.nlm.nih.gov/dbvar>) under study accession number nstd155.

188

### 189 **Association analysis**

190 We tested for association of *CCL3L1* copy number and *CCR5d32* genotype separately with lung  
191 function extremes (as a binary trait) using logistic regression with pack-years of smoking and  
192 the first ten principal components (obtained previously using full genome-wide SNP genotyping  
193 data to adjust for fine-scale population structure as covariates [33]). For *CCR5d32*, a genotypic  
194 genetic model was assumed for the primary analysis. We then fitted a full linear regression  
195 model that included *CCR5d32* genotype (genotypic mode), *CCL3L1* copy number, pack years, 10  
196 principal components and a term for the interaction of *CCR5d32* and *CCL3L1*.

197

198

## 199 Results

200

201 Using CNVrd2, we typed *CCL3L1* copy number from whole genome sequence alignments for  
202 2502 individuals from the 1000 Genomes project (Figure 2a). The data were grouped into large  
203 superpopulations, as defined by the 1000 Genomes Project [44], and our analysis confirmed  
204 previous observations that Europeans have the lowest *CCL3L1* diploid copy number, ranging  
205 between 0 and 5 with a mean copy number of 1.97, and sub-Saharan Africans have the highest  
206 diploid copy number, ranging between 1 and 9 with a mean of 4.19, which is more than twice  
207 as high as Europeans (Table 2)[24, 25].

208

209 For 144 individuals from the CEU (n=96) and YRI (n=48) populations of the 1000 Genomes  
210 project, we also determined *CCL3L1* copy number using the PRT approach (Figure 2b). There  
211 was strong concordance between results, with discrete clusters of raw data, representing  
212 individual integer copy numbers, formed, particularly at low copy number. For the range seen  
213 in Europeans (copy numbers 0 to 5), there are seven clear discrepancies which gives an joint  
214 error rate of 5%.

215

216 To confirm previous studies that reported an association between *CCL3L1* copy number and  
217 *CCL3L1* mRNA levels, we compared the 1000 Genomes Project *CCL3L1* copy numbers with  
218 transcript levels of *CCL3L1* and its non-copy number variable paralogue *CCL3*, as generated by  
219 RNAseq of the corresponding B-lymphoblastoid cell lines (Figures 3a, 3b). Comparison with  
220 transcript level estimates using RNAseq data showed a clear positive correlation between  
221 *CCL3L1* copy number and expression level (figure 3b,  $r^2=0.25$ ,  $p<2\times 10^{-16}$ ). We used the specific  
222 sequence changes between *CCL3L* and *CCL3* to distinguish transcripts from either gene, and  
223 confirmed this by showing that *CCL3* expression has no relationship with *CCL3L1* copy number  
224 (figure 3a,  $r^2=0.006$ ,  $p=0.087$ ), as well as showing that individuals with zero copies of *CCL3L1*  
225 show no transcripts from *CCL3L1* (figure 3b).

226

227 We confirmed an increase of one to two orders of magnitude for *CCL3* transcript levels  
228 compared to *CCL3L1* transcript levels in B-lymphoblast cells. Following normalization of the  
229 *CCL3L1* expression levels to *CCL3* expression levels, we show that *CCL3L1* transcript levels are  
230 closely correlated with gene copy number (Figure 3c,  $r^2=0.5$ ,  $p<2\times 10^{-16}$ ).

231

232 Having confirmed a relationship between gene copy number and transcript levels of *CCL3L1*, we  
233 investigated the relationships between *CCL3L1* copy numbers, CCR5d32 genotype and lung  
234 function in individuals selected from the extremes of the lung function distribution in UK  
235 Biobank. We typed 5000 UK Biobank samples using PRT, with 19 failures. The results showed a  
236 clear mixture of Gaussian distributions centered on each integer copy number (Figure 2c). All 58  
237 duplicates were consistently typed, resulting in an error rate between 0% and 4.7%. We  
238 observed clear distances between the clusters, further suggesting that the measurement error  
239 rate for this cohort is likely to be low.

240

241 We estimated *CCL3L1* integer copy numbers in all the samples using Gaussian mixture  
242 modelling (Table 3). The copy number range was consistent with previous observations in UK

243 population [24], and with our estimation from the 1000 Genomes project samples. The two  
244 copy genotype was the most frequent with a frequency of 0.563. The *CCL3L1* zero copy null  
245 genotype is uncommon, with a frequency of 2.5% in the UK. 4993 of the 5000 UK Biobank  
246 samples were genotyped for *CCR5d32* by imputation with the genotypes for 474 individuals  
247 validated using direct PCR analysis. There was no evidence that the genotype frequencies  
248 departed from Hardy-Weinberg equilibrium (chi-squared test,  $p=0.35$ ) and the observed  
249 *CCR5d32* deletion allele frequency was 0.11, consistent with previous estimates [13].

250  
251 A total of 4975 UK Biobank individuals had both *CCL3L1* copy number and *CCR5d32* genotypes  
252 measured (2486 high and 2489 low FEV<sub>1</sub>, Table 4). There was no evidence of an association  
253 between *CCL3L1* copy number and *CCR5d32* genotype (chi-squared test  $p=0.803$ ).

254  
255 We fitted a full model with both *CCR5* genotypes (genotypic model) and *CCL3L1* copy number  
256 and an interaction term as described above. This was undertaken in order to identify whether  
257 particular combinations of *CCL3L1* copy number and *CCR5d32* genotype were differentially  
258 associated with lung function. Pack years of smoking and 10 principal components were  
259 included as covariates. No associations were significant (Table 5).

260  
261

262

## 263 Discussion

264

265 Our study provides robust large-scale confirmation of a gene dosage effect of *CCL3L1* copy  
266 number on *CCL3L1* mRNA levels, and also emphasises the strong dependence of *CCL3L1*:*CCL3*  
267 mRNA ratio on copy number, with *CCL3L1* copy number accounting for 50% of total variation.  
268 Although it is clear that *CCL3L1* is expressed at much lower levels than *CCL3*, the MIP1alpha  
269 isoform encoded by *CCL3L1* (LD78beta) has a much stronger affinity to the CCR5 receptor than  
270 MIP1alpha isoform *CCL3* (LD78alpha). It therefore seems likely that the *CCL3L1* copy number  
271 variation mediates a biological effect *in vivo*. It should be noted that the expression data are from  
272 transformed B-lymphoblastoid cell lines, but a gene dosage effect is consistent with a study using  
273 fresh monocytes from 55 different individuals stimulated with bacterial lipopolysaccharide [28].  
274

275

275 Our analysis provides evidence that there is no effect of either *CCL3L1* copy number or *CCR5d32*  
276 genotype, or any combinations of genotypes at the two loci, on lung function. This suggests that,  
277 although the Mip1alpha-CCR5 signaling axis can be disrupted by artificial CCR5 antagonists, there  
278 is no evidence that this axis has a functional effect on lung function and that development of new  
279 drugs to target this axis, or repurposing of existing drugs, might be of little or no therapeutic  
280 benefit in treating COPD.  
281

282

282 We analysed approximately 5000 individuals. Whilst this represents a large sample size for  
283 labour-intensive PRT assays, it is a modest sample size in comparison with those employed in  
284 GWAS. That said, power was boosted by selecting from the extremes of the lung function  
285 distribution in the very large (n~500K) UK Biobank.  
286

287

287 We reported PRT error rates of 2.5% for the 144 1000 Genomes Project samples and between  
288 0% and 4.75% for the 4981 UK Biobank participants. A previous study using this PRT approach  
289 estimated an error rate of less than 0.1% [24], which suggests that much of the joint error rate  
290 for the PRT and sequence read depth could be due to errors in the sequence read depth  
291 approach.  
292

293

293 The exact boundaries of the *CCL3L1* CNV have yet to be determined with precision but it is known  
294 to include the *CCL4L1* gene which encodes MIP1 $\beta$  [24]. The human genome assembly GRCh38  
295 shows a single copy *CCL3L1/CCL4L1* repeat unit, and also includes the *TBC1D3* gene, encoding  
296 TBC1 Domain Family Member 3 [45-47]. The GRCh38 alternative assembly chr17\_KI270909v1\_alt  
297 shows two repeat units, both including *TBC1D3*. However an earlier assembly shows a complete  
298 contig with two repeat units carrying *CCL3L1/CCL4L1*, only one of which carries *TBC1D3*.  
299 ArrayCGH and fiber-FISH both confirm this is real heterogeneity by showing that the *TBC1D3* gene  
300 is included in some, but not all, tandemly repeated units in some individuals, together with  
301 *CCL3L1* and *CCL4L1* [26, 48]. Throughout this paper, and in most of the literature, *CCL3L1* CNV is  
302 used as a shorthand to describe the CNV of this complex repeat unit.  
303

304

304 Given the gene content of this repeat unit, we would expect a gene dosage effect for *CCL4L1* and  
305 *TBC1D3*, in addition to *CCL3L1*, but this has not yet been confirmed. Our data do, however, show



306 no effect of *CCL3L1* copy number on expression levels of its close paralogue, *CCL3*, which is  
307 immediately proximal to the CNV. This difference shows that the considerable variation in  
308 genome structure distal to the *CCL3* gene does not affect overall levels of *CCL3* expression.

309  
310 In summary, we selected individuals from the extremes of the lung function distribution of a very  
311 large general population cohort. We found no association of *CCL3L1* copy number, nor of the  
312 CCR5d32 variant with lung function, as defined by FEV<sub>1</sub>.

313

### 314 **Acknowledgements**

315 This research has been conducted using the UK Biobank Resource under Application Number  
316 7140. This work was supported by funding from Pfizer, Inc to MDT, LVW and EJH. This article  
317 presents independent research funded partially by the National Institute for Health Research  
318 (NIHR). The views expressed are those of the author(s) and not necessarily those of the NHS,  
319 the NIHR or the Department of Health. Single nucleotide polymorphism genotyping of the UK  
320 BiLEVE subset of UK Biobank was funded by a Medical Research Council (MRC) strategic award  
321 to MDT, IPH, DPS and LVW (MC\_PC\_12010) (UK Biobank Application Number 648). LVW holds  
322 a GSK / British Lung Foundation Chair in Respiratory Research. MDT holds a Wellcome Trust  
323 Investigator Award. This research used the ALICE and SPECTRE High Performance Computing  
324 Facilities at the University of Leicester. We would like to thank Gurdeep Lall and Amelia Veselis  
325 for technical support.

326

327

328

329 **Figure 1 – Study design**

330 FEV<sub>1</sub> is percent predicted FEV<sub>1</sub>.

331 \*Lung function measurement quality control defined previously [33]

332 # Final numbers after quality control [33]

333

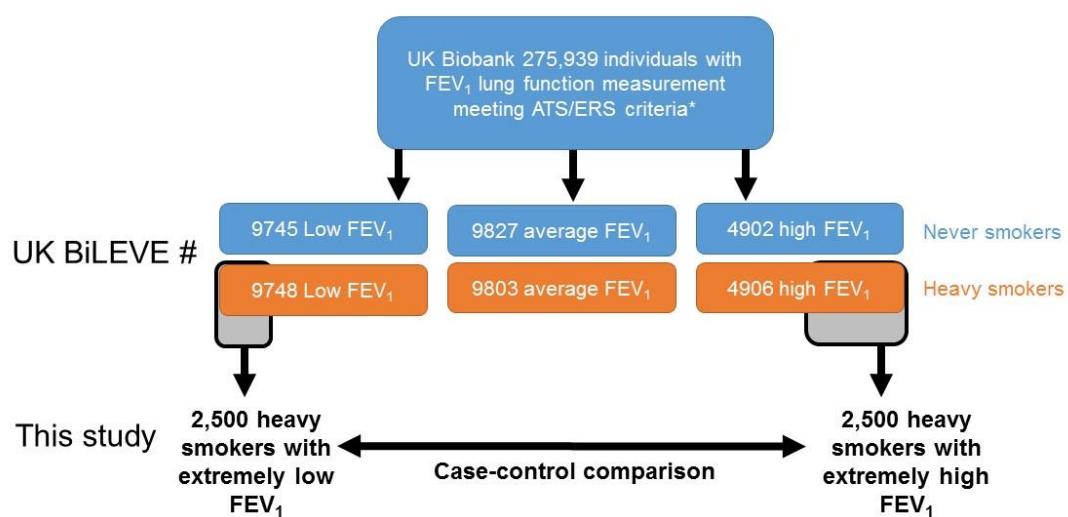

334

335 **Figure 2 – CCL3L1 Copy number typing**

- 336 a) Histogram of raw copy number estimates of 1000 Genomes Project samples from  
337 sequence read depth represented as segmentation scores on the x axis, generated by CNVrd2,  
338 with higher scores reflecting higher copy number.  
339 b) Validation of 144 1000 Genomes Project samples using PRT (x axis) against estimates  
340 made from sequence read depth. Colours/symbols in the scatterplot represent different integer  
341 copy numbers inferred from PRT clusters.  
342 c) Histogram of raw copy number estimates using PRT for the UK Biobank cohort.

a)

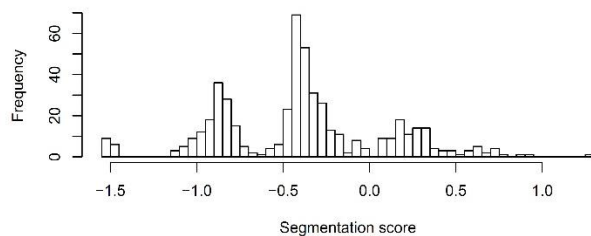

b)

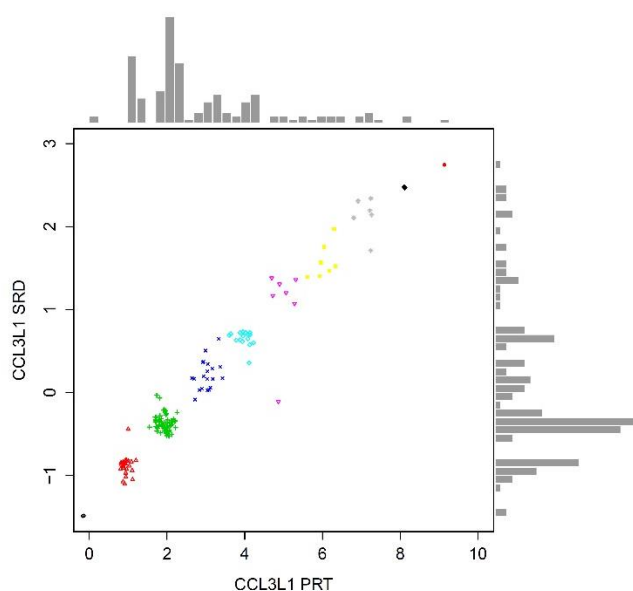

c)

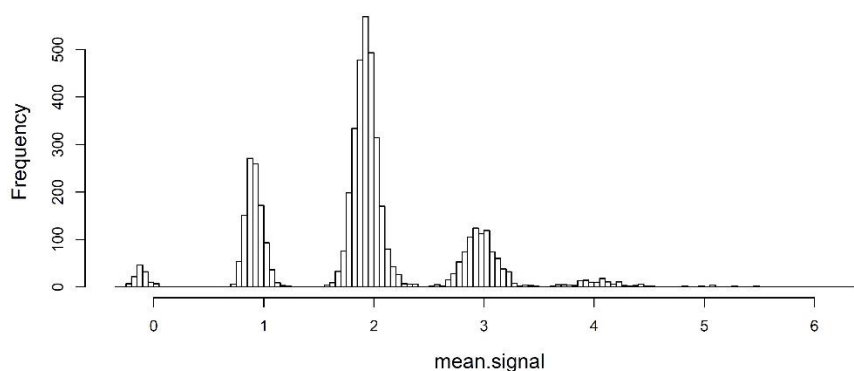

344 **Figure 3 – Copy number and expression level of *CCL3L1* and *CCL3* in lymphoblastoid cell lines**

345

346 a) *CCL3* mRNA level (FPKM units) across different *CCL3L1* copy numbers.

347 b) *CCL3L1* mRNA level (FPKM units) across different *CCL3L1* copy numbers.

348 c) *CCL3L1*:*CCL3* mRNA ratio across different *CCL3L1* copy numbers.

349 Individual data points are shown, with red bars indicating median and interquartile ranges.

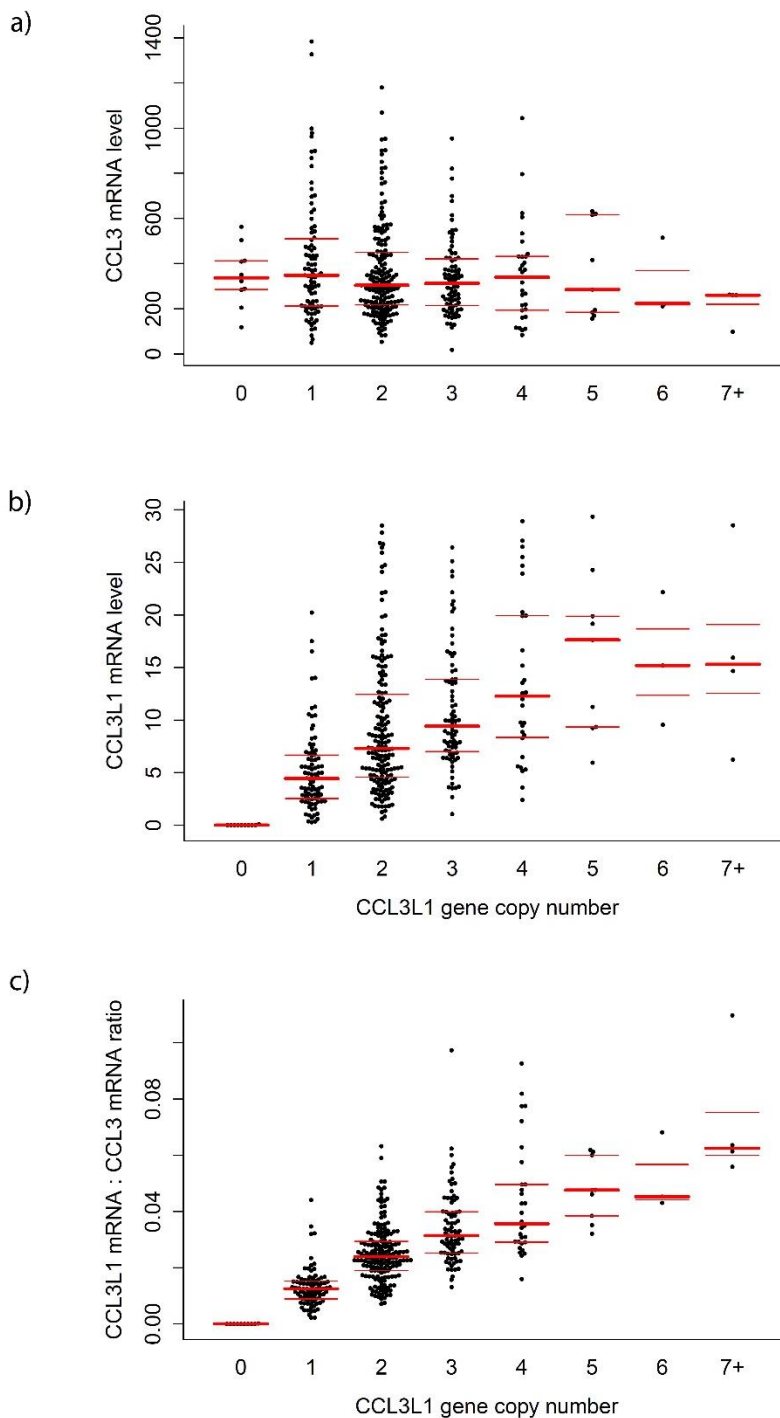

350

351  
352  
353  
354

**Table 1 – Demographics of selected UK Biobank cohort**

|                                         | <b>Low FEV<sub>1</sub> (n=2500)</b> | <b>High FEV<sub>1</sub> (n=2500)</b> |
|-----------------------------------------|-------------------------------------|--------------------------------------|
| n (%) male                              | 1250 (50%)                          | 1250 (50%)                           |
| Age                                     | 56.9 / 7.9<br>(40, 70)              | 56.9 / 7.9<br>(40, 70)               |
| Pack-years                              | 40.6 / 22.5<br>(10.8, 301.0)        | 29.37 / 13.4<br>(10.5, 134.0)        |
| Pack-years as a proportion of lifespan. | 0.96 / 0.47<br>(0.42, 7.00)         | 0.70 / 0.29<br>(0.42, 3.03)          |
| FEV <sub>1</sub> (litres)               | 1.50 / 0.47<br>(0.36, 3.38)         | 3.64 / 0.73<br>(2.02, 6.72)          |
| Percent predicted FEV <sub>1</sub>      | 51.4 / 11.0<br>(14.9, 74.5)         | 123.3 / 8.2<br>(112.8, 205.7)        |

355 Values are Mean / SD (range), unless stated.

356  
357  
358  
359

**Table 2 -- *CCL3L1* copy number frequency distributions in 1000 Genomes data**

| <b>superpopulation</b>           | <b>n</b> | <b>average copy number</b> | <b>minimum copy number</b> | <b>maximum copy number</b> |
|----------------------------------|----------|----------------------------|----------------------------|----------------------------|
| <b>AFR (Sub-Saharan African)</b> | 661      | 4.19                       | 1                          | 9                          |
| <b>AMR (Admixed American)</b>    | 347      | 2.71                       | 0                          | 8                          |
| <b>EAS (East Asian)</b>          | 504      | 3.52                       | 0                          | 9                          |
| <b>EUR (European)</b>            | 501      | 1.97                       | 0                          | 5                          |
| <b>SAS (South Asian)</b>         | 489      | 2.39                       | 0                          | 7                          |

360  
361  
362  
363  
364  
365  
366  
367  
368  
369  
370  
371  
372  
373

374 **Table 3 CCL3L1 copy number counts in UK Biobank data**

375

| CCL3L1 diploid copy number | Number of samples | Frequency |
|----------------------------|-------------------|-----------|
| 0                          | 127               | 0.025     |
| 1                          | 1046              | 0.210     |
| 2                          | 2806              | 0.563     |
| 3                          | 853               | 0.171     |
| 4                          | 128               | 0.026     |
| 5                          | 21                | 0.004     |
| Sum                        | 4981              | 0.999     |

376

377

378 **Table 4 CCR5d32 genotype counts by CCL3L1 copy number in UK Biobank data**

379

| CCL3L1 copy number | CCR5d32 genotype |           |             |
|--------------------|------------------|-----------|-------------|
|                    | ref/ref          | del32/ref | del32/del32 |
| 0                  | 92               | 33        | 2           |
| 1                  | 826              | 203       | 16          |
| 2                  | 2197             | 574       | 31          |
| 3                  | 662              | 181       | 9           |
| 4                  | 99               | 28        | 1           |
| 5                  | 15               | 6         | 0           |
| Sum                | 3891             | 1025      | 59          |

380

381

382

383  
384  
385  
386  
387

**Table 5 - Association analysis of *CCR5* genotype and *CCL3L1* copy number with high vs low FEV<sub>1</sub>**

|                                                                          | OR (95% CI)      | P value |
|--------------------------------------------------------------------------|------------------|---------|
| <b>CCR5d32 deletion heterozygote main effect</b>                         | 0.84 (0.57-1.23) | 0.38    |
| <b>CCR5d32 deletion homozygote main effect</b>                           | 0.29 (0.07-1.30) | 0.11    |
| <b>CCL3L1 copy number main effect</b>                                    | 1.00 (0.92-1.09) | 0.97    |
| <b>CCR5d32 deletion heterozygote interaction with CCL3L1 copy number</b> | 1.11 (0.93-1.32) | 0.27    |
| <b>CCR5d32 deletion homozygote interaction with CCL3L1 copy number</b>   | 1.74 (0.83-3.64) | 0.14    |

388 2486 samples with high FEV<sub>1</sub> and 2489 samples with low FEV<sub>1</sub>  
389 Covariates: smoking pack-years, 10 principal components of SNP genetic variation.  
390  
391

## 392 References

- 393  
394 1. Nelson MR, Johnson T, Warren L, Hughes AR, Chissoe SL, Xu CF, et al. The genetics of  
395 drug efficacy: opportunities and challenges. *Nat Rev Genet.* 2016;17(4):197-206. Epub  
396 2016/03/15. doi: 10.1038/nrg.2016.12. PubMed PMID: 26972588.
- 397 2. Menten P, Wuyts A, Van Damme J. Macrophage inflammatory protein-1. *Cytokine*  
398 *Growth Factor Rev.* 2002;13(6):455-81. Epub 2002/10/29. PubMed PMID: 12401480.
- 399 3. Carter PH. Chemokine receptor antagonism as an approach to anti-inflammatory  
400 therapy: 'just right' or plain wrong? *Current Opinion in Chemical Biology.* 2002;6(4):510-25. doi:  
401 [https://doi.org/10.1016/S1367-5931\(02\)00351-4](https://doi.org/10.1016/S1367-5931(02)00351-4).
- 402 4. Lieberman-Blum SS, Fung HB, Bandres JC. Maraviroc: a CCR5-receptor antagonist for the  
403 treatment of HIV-1 infection. *Clin Ther.* 2008;30(7):1228-50. Epub 2008/08/12. PubMed PMID:  
404 18691983.
- 405 5. Koelink PJ, Overbeek SA, Braber S, de Kruijf P, Folkerts G, Smit MJ, et al. Targeting  
406 chemokine receptors in chronic inflammatory diseases: an extensive review. *Pharmacol Ther.*  
407 2012;133(1):1-18. Epub 2011/08/16. doi: 10.1016/j.pharmthera.2011.06.008. PubMed PMID:  
408 21839114.
- 409 6. Cook DN, Beck MA, Coffman TM, Kirby SL, Sheridan JF, Pragnell IB, et al. Requirement of  
410 MIP-1 alpha for an inflammatory response to viral infection. *Science.* 1995;269(5230):1583-5.  
411 Epub 1995/09/15. PubMed PMID: 7667639.
- 412 7. Lindell DM, Standiford TJ, Mancuso P, Leshen ZJ, Huffnagle GB. Macrophage  
413 inflammatory protein 1alpha/CCL3 is required for clearance of an acute *Klebsiella pneumoniae*

- 414 pulmonary infection. *Infect Immun.* 2001;69(10):6364-9. Epub 2001/09/13. doi:  
415 10.1128/iai.69.10.6364-6369.2001. PubMed PMID: 11553580; PubMed Central PMCID:  
416 PMCPMC98771.
- 417 8. Domachowske JB, Bonville CA, Gao JL, Murphy PM, Easton AJ, Rosenberg HF. MIP-  
418 1alpha is produced but it does not control pulmonary inflammation in response to respiratory  
419 syncytial virus infection in mice. *Cell Immunol.* 2000;206(1):1-6. Epub 2001/02/13. doi:  
420 10.1006/cimm.2000.1730. PubMed PMID: 11161432.
- 421 9. Haeberle HA, Kuziel WA, Dieterich HJ, Casola A, Gatalica Z, Garofalo RP. Inducible  
422 expression of inflammatory chemokines in respiratory syncytial virus-infected mice: role of MIP-  
423 1alpha in lung pathology. *J Virol.* 2001;75(2):878-90. Epub 2001/01/03. doi:  
424 10.1128/jvi.75.2.878-890.2001. PubMed PMID: 11134301; PubMed Central PMCID:  
425 PMCPMC113984.
- 426 10. Tregoning JS, Pribul PK, Pennycook AM, Hussell T, Wang B, Lukacs N, et al. The  
427 chemokine MIP1alpha/CCL3 determines pathology in primary RSV infection by regulating the  
428 balance of T cell populations in the murine lung. *PLoS One.* 2010;5(2):e9381. Epub 2010/03/03.  
429 doi: 10.1371/journal.pone.0009381. PubMed PMID: 20195359; PubMed Central PMCID:  
430 PMCPMC2827540.
- 431 11. Fuke S, Betsuyaku T, Nasuhara Y, Morikawa T, Katoh H, Nishimura M. Chemokines in  
432 bronchiolar epithelium in the development of chronic obstructive pulmonary disease. *Am J*  
433 *Respir Cell Mol Biol.* 2004;31(4):405-12. Epub 2004/06/29. doi: 10.1165/rcmb.2004-0131OC.  
434 PubMed PMID: 15220136.
- 435 12. Ravi AK, Khurana S, Lemon J, Plumb J, Booth G, Healy L, et al. Increased levels of soluble  
436 interleukin-6 receptor and CCL3 in COPD sputum. *Respir Res.* 2014;15:103. Epub 2014/09/04.  
437 doi: 10.1186/s12931-014-0103-4. PubMed PMID: 25183374; PubMed Central PMCID:  
438 PMCPMC4156958.
- 439 13. Martinson JJ, Chapman NH, Rees DC, Liu YT, Clegg JB. Global distribution of the CCR5  
440 gene 32-basepair deletion. *Nat Genet.* 1997;16(1):100-3. Epub 1997/05/01. doi:  
441 10.1038/ng0597-100. PubMed PMID: 9140404.
- 442 14. Liu R, Paxton WA, Choe S, Ceradini D, Martin SR, Horuk R, et al. Homozygous defect in  
443 HIV-1 coreceptor accounts for resistance of some multiply-exposed individuals to HIV-1  
444 infection. *Cell.* 1996;86(3):367-77. Epub 1996/08/09. PubMed PMID: 8756719.
- 445 15. Samson M, Libert F, Doranz BJ, Rucker J, Liesnard C, Farber CM, et al. Resistance to HIV-  
446 1 infection in caucasian individuals bearing mutant alleles of the CCR-5 chemokine receptor  
447 gene. *Nature.* 1996;382(6593):722-5. Epub 1996/08/22. doi: 10.1038/382722a0. PubMed  
448 PMID: 8751444.
- 449 16. Naranbhai V, Carrington M. Host genetic variation and HIV disease: from mapping to  
450 mechanism. *Immunogenetics.* 2017;69(8-9):489-98. Epub 2017/07/12. doi: 10.1007/s00251-  
451 017-1000-z. PubMed PMID: 28695282; PubMed Central PMCID: PMCPMC5537324.
- 452 17. Hall IP, Wheatley A, Christie G, McDougall C, Hubbard R, Helms PJ. Association of CCR5  
453 delta32 with reduced risk of asthma. *Lancet.* 1999;354(9186):1264-5. Epub 1999/10/16.  
454 PubMed PMID: 10520641.
- 455 18. Mitchell TJ, Walley AJ, Pease JE, Venables PJ, Wiltshire S, Williams TJ, et al. Delta 32  
456 deletion of CCR5 gene and association with asthma or atopy. *Lancet.* 2000;356(9240):1491-2.  
457 Epub 2000/11/18. doi: 10.1016/s0140-6736(00)03144-5. PubMed PMID: 11081537.



- 458 19. Song GG, Kim JH, Lee YH. The chemokine receptor 5 delta32 polymorphism and type 1  
459 diabetes, Behcet's disease, and asthma: a meta-analysis. *Immunol Invest.* 2014;43(2):123-36.  
460 Epub 2013/11/01. doi: 10.3109/08820139.2013.847457. PubMed PMID: 24171669.
- 461 20. Irving SG, Zipfel PF, Balke J, McBride OW, Morton CC, Burd PR, et al. Two inflammatory  
462 mediator cytokine genes are closely linked and variably amplified on chromosome 17q. *Nucleic  
463 Acids Res.* 1990;18(11):3261-70. Epub 1990/06/11. PubMed PMID: 1972563; PubMed Central  
464 PMCID: PMCPMC330932.
- 465 21. Nakao M, Nomiya H, Shimada K. Structures of human genes coding for cytokine LD78  
466 and their expression. *Mol Cell Biol.* 1990;10(7):3646-58. Epub 1990/07/01. PubMed PMID:  
467 1694014; PubMed Central PMCID: PMCPMC360801.
- 468 22. Nibbs RJ, Yang J, Landau NR, Mao JH, Graham GJ. LD78beta, a non-allelic variant of  
469 human MIP-1alpha (LD78alpha), has enhanced receptor interactions and potent HIV  
470 suppressive activity. *J Biol Chem.* 1999;274(25):17478-83. Epub 1999/06/11. PubMed PMID:  
471 10364178.
- 472 23. Field SF, Howson JM, Maier LM, Walker S, Walker NM, Smyth DJ, et al. Experimental  
473 aspects of copy number variant assays at CCL3L1. *Nat Med.* 2009;15(10):1115-7. Epub  
474 2009/10/09. doi: 10.1038/nm1009-1115. PubMed PMID: 19812562; PubMed Central PMCID:  
475 PMC2873561.
- 476 24. Walker S, Janyakhantikul S, Armour JA. Multiplex Parologue Ratio Tests for accurate  
477 measurement of multiallelic CNVs. *Genomics.* 2009;93(1):98-103.
- 478 25. Carpenter D, Färnert A, Rooth I, Armour JA, Shaw M-A. CCL3L1 copy number  
479 and susceptibility to malaria. *Infection, Genetics and Evolution.* 2012;(12):1147-54.
- 480 26. Aklillu E, Odenthal-Hesse L, Bowdrey J, Habtewold A, Ngaimisi E, Yimer G, et al. CCL3L1  
481 copy number, HIV load, and immune reconstitution in sub-Saharan Africans. *BMC infectious  
482 diseases.* 2013;13(1):536.
- 483 27. Townson JR, Barcellos LF, Nibbs RJ. Gene copy number regulates the production of the  
484 human chemokine CCL3-L1. *European journal of immunology.* 2002;32(10):3016-26.
- 485 28. Carpenter D, McIntosh R, Pleass R, Armour J. Functional effects of CCL3L1 copy number.  
486 *Genes and Immunity.* 2012;13(5):374-9.
- 487 29. Cantsilieris S, Western PS, Baird PN, White SJ. Technical considerations for genotyping  
488 multi-allelic copy number variation (CNV), in regions of segmental duplication. *BMC genomics.*  
489 2014;15(1):329.
- 490 30. Gonzalez E, Kulkarni H, Bolivar H, Mangano A, Sanchez R, Catano G, et al. The influence  
491 of CCL3L1 gene-containing segmental duplications on HIV-1/AIDS susceptibility. *Science.*  
492 2005;307(5714):1434-40.
- 493 31. Urban TJ, Weintrob AC, Fellay J, Colombo S, Shianna KV, Gumbs C, et al. CCL3L1 and  
494 HIV/AIDS susceptibility. *Nat Med.* 2009;15(10):1110-2. doi:  
495 [http://www.nature.com/nm/journal/v15/n10/suppinfo/nm1009-1110\\_S1.html](http://www.nature.com/nm/journal/v15/n10/suppinfo/nm1009-1110_S1.html).
- 496 32. Armour JAL, Palla R, Zeeuwen PLJM, den Heijer M, Schalkwijk J, Hollox EJ. Accurate,  
497 high-throughput typing of copy number variation using parologue ratios from dispersed  
498 repeats. *Nucleic acids research.* 2007;35(3):e19-e.
- 499 33. Wain LV, Shrine N, Miller S, Jackson VE, Ntalla I, Soler Artigas M, et al. Novel insights into  
500 the genetics of smoking behaviour, lung function, and chronic obstructive pulmonary disease  
501 (UK BiLEVE): a genetic association study in UK Biobank. *Lancet Respir Med.* 2015;3(10):769-81.

- 502 Epub 2015/10/02. doi: 10.1016/s2213-2600(15)00283-0. PubMed PMID: 26423011; PubMed  
503 Central PMCID: PMC4593935.
- 504 34. Wain LV, Shrine N, Artigas MS, Erzurumluoglu AM, Noyvert B, Bossini-Castillo L, et al.  
505 Genome-wide association analyses for lung function and chronic obstructive pulmonary disease  
506 identify new loci and potential druggable targets. *Nat Genet.* 2017;49(3):416-25. Epub  
507 2017/02/07. doi: 10.1038/ng.3787. PubMed PMID: 28166213; PubMed Central PMCID:  
508 PMC45326681.
- 509 35. Miller MR, Hankinson J, Brusasco V, Burgos F, Casaburi R, Coates A, et al.  
510 Standardisation of spirometry. *Eur Respir J.* 2005;26(2):319-38. Epub 2005/08/02. doi:  
511 10.1183/09031936.05.00034805. PubMed PMID: 16055882.
- 512 36. Hollox EJ. Analysis of Copy Number Variation Using the Parologue Ratio Test (PRT).  
513 *Methods in molecular biology* (Clifton, NJ). 2017;1492:127-46. Epub 2016/11/09. doi:  
514 10.1007/978-1-4939-6442-0\_8. PubMed PMID: 27822860.
- 515 37. Carpenter D, Taype C, Goulding J, Levin M, Eley B, Anderson S, et al. CCL3L1 copy  
516 number, CCR5 genotype and susceptibility to tuberculosis. *BMC medical genetics.* 2014;15(1):5.  
517 38. Barnes C, Plagnol V, Fitzgerald T, Redon R, Marchini J, Clayton D, et al. A robust  
518 statistical method for case-control association testing with copy number variation. *Nature*  
519 *Genetics.* 2008;40(10):1245-52.
- 520 39. Trapnell C, Roberts A, Goff L, Pertea G, Kim D, Kelley DR, et al. Differential gene and  
521 transcript expression analysis of RNA-seq experiments with TopHat and Cufflinks. *Nat Protoc.*  
522 2012;7(3):562-78. Epub 2012/03/03. doi: 10.1038/nprot.2012.016. PubMed PMID: 22383036;  
523 PubMed Central PMCID: PMC3334321.
- 524 40. Huang J, Howie B, McCarthy S, Memari Y, Walter K, Min JL, et al. Improved imputation  
525 of low-frequency and rare variants using the UK10K haplotype reference panel. *Nat Commun.*  
526 2015;6:8111. Epub 2015/09/15. doi: 10.1038/ncomms9111. PubMed PMID: 26368830; PubMed  
527 Central PMCID: PMC4579394.
- 528 41. Delaneau O, Zagury JF, Marchini J. Improved whole-chromosome phasing for disease  
529 and population genetic studies. *Nat Methods.* 2013;10(1):5-6. Epub 2012/12/28. doi:  
530 10.1038/nmeth.2307. PubMed PMID: 23269371.
- 531 42. Howie BN, Donnelly P, Marchini J. A flexible and accurate genotype imputation method  
532 for the next generation of genome-wide association studies. *PLoS Genet.* 2009;5(6):e1000529.  
533 Epub 2009/06/23. doi: 10.1371/journal.pgen.1000529. PubMed PMID: 19543373; PubMed  
534 Central PMCID: PMC2689936.
- 535 43. Nguyen HT, Merriman TR, Black MA. The CNVrd2 package: measurement of copy  
536 number at complex loci using high-throughput sequencing data. *Front Genet.* 2014;5:248. Epub  
537 2014/08/20. doi: 10.3389/fgene.2014.00248. PubMed PMID: 25136349; PubMed Central  
538 PMCID: PMC4117933.
- 539 44. 1000 Genomes Project Consortium, Auton A, Brooks LD, Durbin RM, Garrison EP, Kang  
540 HM, et al. A global reference for human genetic variation. *Nature.* 2015;526(7571):68-74. Epub  
541 2015/10/04. doi: 10.1038/nature15393. PubMed PMID: 26432245; PubMed Central PMCID:  
542 PMC4750478.
- 543 45. Hodzic D, Kong C, Wainszelbaum MJ, Charron AJ, Su X, Stahl PD. TBC1D3, a hominoid  
544 oncoprotein, is encoded by a cluster of paralogues located on chromosome 17q12. *Genomics.*

- 545 2006;88(6):731-6. Epub 2006/07/26. doi: 10.1016/j.ygeno.2006.05.009. PubMed PMID:  
546 16863688.
- 547 46. Wainszelbaum MJ, Charron AJ, Kong C, Kirkpatrick DS, Srikanth P, Barbieri MA, et al. The  
548 hominoid-specific oncogene TBC1D3 activates Ras and modulates epidermal growth factor  
549 receptor signaling and trafficking. *J Biol Chem.* 2008;283(19):13233-42. Epub 2008/03/06. doi:  
550 10.1074/jbc.M800234200. PubMed PMID: 18319245; PubMed Central PMCID:  
551 PMCPMC2442359.
- 552 47. Frittoli E, Palamidessi A, Pizzigoni A, Lanzetti L, Garre M, Troglio F, et al. The primate-  
553 specific protein TBC1D3 is required for optimal macropinocytosis in a novel ARF6-dependent  
554 pathway. *Mol Biol Cell.* 2008;19(4):1304-16. Epub 2008/01/18. doi: 10.1091/mbc.E07-06-0594.  
555 PubMed PMID: 18199687; PubMed Central PMCID: PMCPMC2291429.
- 556 48. Perry GH, Yang F, Marques-Bonet T, Murphy C, Fitzgerald T, Lee AS, et al. Copy number  
557 variation and evolution in humans and chimpanzees. *Genome Research.* 2008;18(11):1698-710.  
558
